# Supplementary material
Source: PubMed Central journal article supplement (PMC7313716)
Supplement: NIHMS1600363-supplement-Supporting_Information.pdf [file NIHMS1600363-supplement-Supporting_Information.pdf]

Supporting information to:

## “Parallelization of CPPTRAJ Enables Large Scale Analysis of Molecular Dynamics Trajectory Data”

Submitted to Journal of Computational Chemistry, April 2018.

### Table of Contents

|                                                                                |   |
|--------------------------------------------------------------------------------|---|
| 1. Detailed Timings for Across-trajectory Parallel Hydrogen Bond Analysis..... | 1 |
| 2. Action command lists with brief descriptions .....                          | 2 |
| 3. Illustration of Single Replica Processing vs Ensemble Processing.....       | 4 |
| 4. Examples of Ensemble Processing .....                                       | 4 |
| 5. Additional Considerations when Parallelizing Actions .....                  | 5 |
| 6. Results of Darshan analysis on NCSA Blue Waters.....                        | 6 |

### 1. Detailed Timings for Across-trajectory Parallel Hydrogen Bond Analysis

Run on LoBoS cluster at NIH, Haswell E5-2630 v3 @ 2.4GHz, 2x8 core, Infiniband FDR, NFS mount.

10 runs each PPN.

Command: `hbond HB out nhb.dat avgout hbavg.dat series uuseries UUseries.dat`

375 acceptor-only atoms, 371 acceptor/donor sites, 440 solute hydrogens.

Input Trajectories: 49209 atoms, 9 NetCDF trajectories (2000 frames each), 10.137 GB total.

Data Sets: 1127 integer data sets, 18000 frames (77MB total), hbond data set (12MB), 89MB total.

Data Files: hbavg.dat 116KB, nhb.dat 387KB, UUseries.dat 506MB, 506.318MB total.

| PPN | Total  | SD   | Trajin | SD   | Action | SD   | Data | SD   | Sync | SD   |
|-----|--------|------|--------|------|--------|------|------|------|------|------|
| 1   | 22.62  | 0.86 | 8.27   | 1.12 | 2.35   | 0.06 | 9.14 | 0.06 | 0.08 | 0.01 |
| 2   | 23.11  | 0.36 | 9.66   | 0.45 | 2.41   | 0.08 | 9.08 | 0.14 | 0.06 | 0.01 |
| 4   | 33.43  | 0.24 | 20.16  | 0.32 | 2.56   | 0.07 | 9.06 | 0.10 | 0.06 | 0.01 |
| 8   | 56.29  | 0.26 | 42.56  | 0.52 | 2.68   | 0.05 | 9.36 | 0.05 | 0.06 | 0.01 |
| 16  | 102.16 | 0.14 | 86.83  | 1.39 | 2.70   | 0.14 | 9.79 | 0.10 | 0.07 | 0.01 |

## 2. Action command lists with brief descriptions

Table S 1: List of all Action commands available in CPPTRAJ 16+ (OpenMP X=enabled).

| Action Command  | Description                                                                                  | OpenMP |
|-----------------|----------------------------------------------------------------------------------------------|--------|
| angle           | Calculate an angle.                                                                          |        |
| areapermol      | Basic area per molecule calculation in a designated plane.                                   |        |
| atomiccorr      | Calculate atomic movement correlations.                                                      | X      |
| atomicfluct     | Calculate atomic fluctuations.                                                               |        |
| atommap         | Determine mapping between two reference structures with potentially different atom ordering. |        |
| autoimage       | Automatically re-image trajectory.                                                           |        |
| average         | Calculate average structure.                                                                 |        |
| bounds          | Calculate X Y and Z bounds of selected atoms.                                                |        |
| box             | Set box information for input frames.                                                        |        |
| center          | Center coordinates to a location.                                                            |        |
| check           | Check input frames for bad overlaps/bond lengths.                                            | X      |
| checkchirality  | Check protein residue chirality (D or L).                                                    |        |
| checkoverlap    | See 'check'.                                                                                 |        |
| checkstructure  | See 'check'.                                                                                 |        |
| closest         | Retain only specified number of closest solvent molecules to a selection.                    | X      |
| closestwaters   | See 'closest'.                                                                               |        |
| clusterdihedral | Cluster structures by binning torsions.                                                      |        |
| contacts        | Count atomic contacts based on distance cutoff.                                              |        |
| createcrd       | Create a COORDS data set from input frames.                                                  |        |
| createreservoir | Create a NetCDF reservoir for use with reservoir REMD.                                       |        |
| density         | Calculate system density.                                                                    |        |
| diffusion       | Calculate diffusion from distance traveled using Einstein relation.                          |        |
| dihedral        | Calculate dihedral angle.                                                                    |        |
| dihedralscan    | Rotate dihedral(s) by a fixed interval or randomly.                                          |        |
| dipole          | Calculate dipoles.                                                                           |        |
| distance        | Calculate distances.                                                                         |        |
| drms            | Calculate distance matrix RMS (aka DME).                                                     |        |
| drmsd           | See 'drms'.                                                                                  |        |
| dssp            | Calculate secondary structure using DSSP algorithm.                                          | X      |
| energy          | Calculate basic energy terms.                                                                |        |
| filter          | Filter frames using values from data sets.                                                   |        |
| fixatomorder    | Correct topologies/frames with non-consecutive atom ordering.                                |        |
| gist            | Grid inhomogenous solvation theory.                                                          | X      |
| grid            | Bin coordinates in 3D.                                                                       |        |
| hbond           | Calculate hydrogen bonds.                                                                    | X      |
| image           | Image trajectory.                                                                            |        |
| jcoupling       | Calculate J-coupling values using torsions and the Karplus relation.                         |        |
| lessplit        | Split an LES trajectory.                                                                     |        |
| lie             | Calculate linear interaction energy.                                                         |        |

|                |                                                                                                        |                   |
|----------------|--------------------------------------------------------------------------------------------------------|-------------------|
| lipidorder     | Compute lipid order parameters.                                                                        |                   |
| makestructure  | Manipulate structure by rotating dihedrals to specified values or to match a reference structure.      |                   |
| mask           | Select atoms, intended for use with distance-based masks (updates every frame).                        | X                 |
| matrix         | Calculate various matrices.                                                                            | X<br>(covariance) |
| minimage       | Calculate distance to closest adjacent unit cell.                                                      | X                 |
| molsurf        | Calculate Connolly surface area.                                                                       |                   |
| multidihedral  | Calculate multiple dihedral angles.                                                                    |                   |
| multivector    | Calculate multiple vectors.                                                                            |                   |
| nastruct       | Nucleic acid structure analysis following 3DNA procedure.                                              |                   |
| nativecontacts | Calculate native and non-native contacts based on distance cutoff and reference structure.             |                   |
| outtraj        | Write out trajectory in line with other Actions (as opposed to the end of all Actions like 'trajout'). |                   |
| pairdist       | Pair distribution function.                                                                            |                   |
| pairwise       | Calculate electrostatic and van der Waals energy, potentially comparing to a reference structure.      |                   |
| principal      | Calculate principal axes of a system and optionally align along them.                                  |                   |
| projection     | Calculate projection of coordinates along eigenvectors.                                                |                   |
| pucker         | Calculate ring pucker.                                                                                 |                   |
| radgyr         | Calculate radius of gyration.                                                                          |                   |
| radial         | Calculate radial distribution function                                                                 | X                 |
| randomizeions  | Randomize ion position by swapping with solvent.                                                       |                   |
| replicatecell  | Replicate unit cell in specified direction(s).                                                         | X                 |
| rms            | Calculate coordinate root-mean-square deviation to a reference structure.                              |                   |
| rmsd           | See 'rms'                                                                                              |                   |
| rog            | See 'radgyr'                                                                                           |                   |
| rotate         | Rotate system around X, Y, and/or Z axes.                                                              |                   |
| runavg         | Calculate running average of coordinates.                                                              |                   |
| runningaverage | See 'runavg'                                                                                           |                   |
| scale          | Scale X, Y, and or Z coordinates by a factor.                                                          |                   |
| secstruct      | See 'dssp'                                                                                             |                   |
| setvelocity    | Set coordinate velocities.                                                                             |                   |
| spam           | Simple approach for profiling bound water molecules.                                                   | X                 |
| stfcdiffusion  | Alternate diffusion calculation from distance travelled.                                               |                   |
| strip          | Remove atoms from system.                                                                              |                   |
| surf           | Calculate LCPO surface area.                                                                           | X                 |
| symmrmsd       | Calculate symmetry-corrected coordinate root-mean-square deviation to a reference structure.           |                   |
| temperature    | Calculate temperature from velocity information.                                                       |                   |
| trans          | Translate atoms in X, Y, and/or Z direction.                                                           |                   |
| translate      | See 'trans'.                                                                                           |                   |
| unstrip        | Reset any modifications to topology/coordinates (from e.g. strip, closest, etc).                       |                   |
| unwrap         | Remove imaging from trajectory.                                                                        |                   |

|                  |                                                                                         |   |
|------------------|-----------------------------------------------------------------------------------------|---|
| vector           | Calculate various vectors.                                                              |   |
| velocityautocorr | Calculate velocity autocorrelation.                                                     | X |
| volmap           | Create volumetric map (3D grid).                                                        | X |
| volume           | Calculate unit cell volume.                                                             |   |
| watershell       | Calculate number of waters in first and second solvation shells using distance cutoffs. | X |

### 3. Illustration of Single Replica Processing vs Ensemble Processing

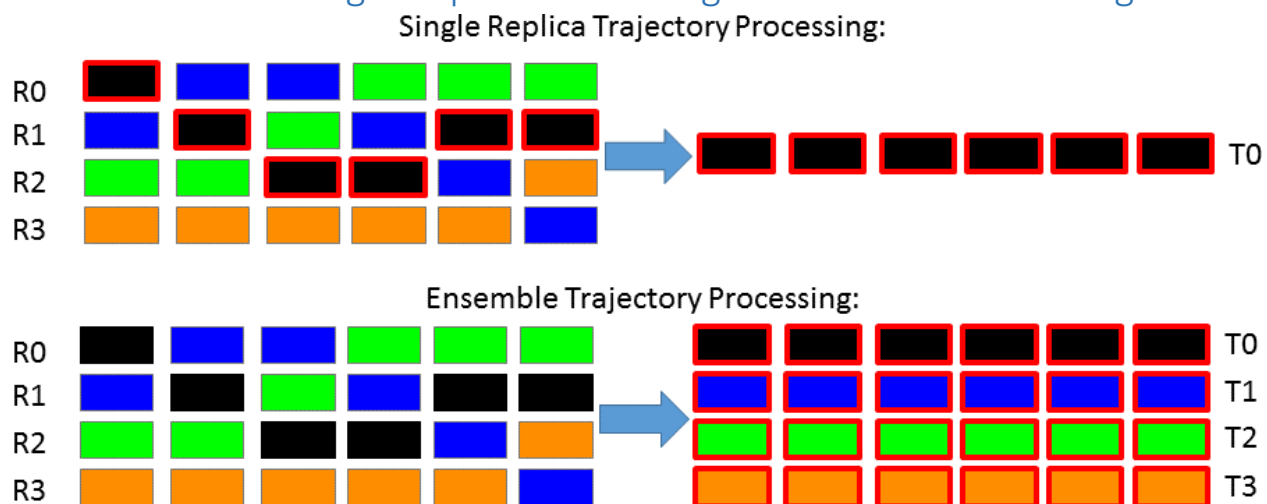

Figure 1. Top) Unsorted “replica” trajectories  $R_X$  containing multiple temperatures (represented by different colors) are read in, but only frames at the temperature of interest ( $T_0$ , black boxes, outlined in red) are actually used. Bottom) Unsorted “replica” trajectories  $R_X$  are read in and sorted, after which frames at all temperatures  $T_X$  are used.

### 4. Examples of Ensemble Processing

#### Example 1 (with sorting)

Given one ensemble of 16 temperature REMD replica trajectories of which the first is named ‘rem1.nc.000’, and a continuation of that ensemble of which the first is named ‘rem2.nc.000’, the following CPPTRAJ input will sort the input trajectories by temperature, remove residues named ‘WAT’ (i.e. remove water), calculate RMSD to a reference structure at each temperature, then write out 16 combined and sorted temperature trajectories. The **ensemble**size command is used to improve ensemble setup performance in parallel:

```
# Load Topology
parm topology.parm7
# Load Reference Structure
reference myref.rst7
# Indicate ensemble size; improves parallel setup efficiency
ensemble size 4
# Load Ensembles of Trajectories, Lowest Member Specified
ensemble rem1.nc.000
ensemble rem2.nc.000
```

```

# Action 1: Strip Residues Named WAT from Ensemble
strip :WAT
# Action 2: Calculate RMSD to Reference for Entire Ensemble
rms reference out rmsd.dat
# Write Out Sorted Ensemble Trajectories to sorted.nc.X
trajout sorted.nc netcdf

```

The output trajectories will have a numerical suffix appended to the name starting from 0 to indicate the position in the sorted ensemble (e.g. 'sorted.nc.0', 'sorted.nc.1', etc.). The file 'rmsd.dat' will have RMSDs for each member of the sorted ensemble in separate columns.

### Example 2 (no sorting)

The following input could be used to process the results from several separate MD runs (md.300.nc, md.325.nc, md.350.nc, and md.375.nc) in parallel:

```

# Load Topology
parm topology.parm7
# Indicate ensemble size; improves parallel setup efficiency
ensemblesize 4
# Load Ensemble of 4 Trajectories, All Names Specified;
# No sorting will be performed.
ensemble md.300.nc trajnames md.325.nc,md.350.nc,md.375.nc nosort
# Calculate Distance Between Residues 1 and 20 for Ensemble
distance end_to_end :1 :20 out end_to_end.agr

```

In this case the additional trajectory names are specified with the **trajnames** keyword since they do not end with numerical suffices (preventing name auto-detection) and the **nosort** keyword indicates the trajectories should be processed as they are. The resulting output file 'end\_to\_end.agr' will contain distances from residue 1 to residue 20 from each of the four trajectories in order (i.e. results from 'md.300.nc' will be first, etc.).

## 5. Additional Considerations when Parallelizing Actions

Certain Actions require additional setup and/or consolidation steps in order to function properly in parallel. For example, any Action that may require using the first frame to be read in as a reference structure needs to have that structure broadcast from the master rank (which will by definition read in the very first frame of all frames to be read) to all other ranks; examples of this are the RMSD, distance RMSD, and symmetric RMSD calculations (**rms**, **drms**, **symmrmsd**), determination of native contacts (**nativecontacts**), calculation of nucleic acid structure analysis (**nastruct**), etc. Actions that require calculation of a sum or an average over all frames need ranks to sync separately after all frames have been read; examples are in calculating atomic fluctuations (**atomicfluct**), average structure (**average**), matrices (**matrix**), grids, (**grid**), etc.

Syncing Data Sets to the master can be complicated in parallel for certain Actions that calculate data elements which may be present only in certain parts of the input trajectory frames, such as hydrogen bonds (**hbond**) or native contacts (**nativecontacts**) calculations. For example, if a certain trajectory has a hydrogen bond that is present for the first half of the trajectory but not the second half, some ranks will record the hydrogen bond as present while others will never have seen the hydrogen bond. As a result, only the ranks that have seen the hydrogen bond will have a Data Set for it. Because of this, certain Actions have an additional phase that occurs after the Trajectory Run called **SyncAction**, which is responsible for any additional data consolidation needed. For example, in **SyncAction** for the hydrogen bond Action, each non-master rank first communicates how many hydrogen bonds it has found, then sends the hydrogen bond data to the master. The master will then either create new Data Sets for hydrogen bonds that are not already present or combine the rank's hydrogen bond data with the existing one on master.

Certain Actions require a “read ahead” of a certain number of frames to work properly; currently these are the correlation of atomic motion vectors (**atomiccorr**), calculation of running average structure (**runavg**), and velocity autocorrelation function (**velocityautocorr**) when velocities are not present. These Actions function in parallel by requesting that each rank read ahead a certain number of frames prior to trajectory processing (reported by the **ParallelPreviousFramesRequired** function and processed by the **ParallelPreloadFrames** function prior to trajectory processing). The downside to this is that the frames that are read in this fashion are not processed by the Action queue; therefore, in parallel these commands should not be used with any command that may modify input frames (such as the RMSD calculation). The code will provide printed warnings to this effect for these commands.

## 6. Results of Darshan analysis on NCSA Blue Waters

# 1 process per replica

|                |            |             |                       |
|----------------|------------|-------------|-----------------------|
| jobid: 3637698 | uid: 30029 | nprocs: 192 | runtime: 6542 seconds |
|----------------|------------|-------------|-----------------------|

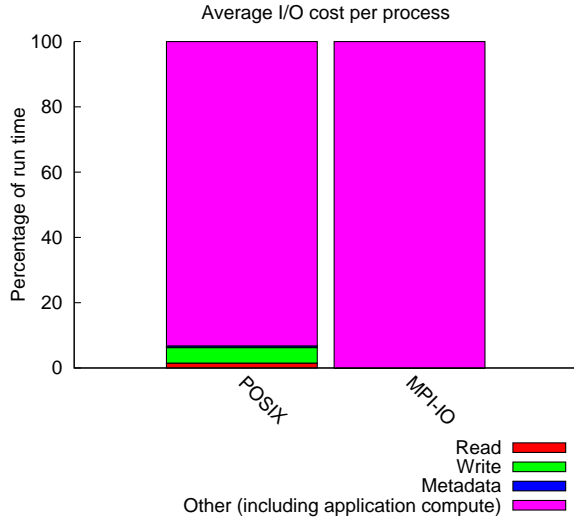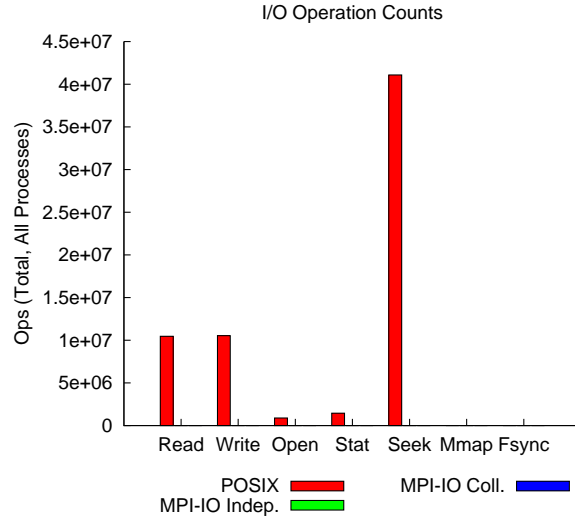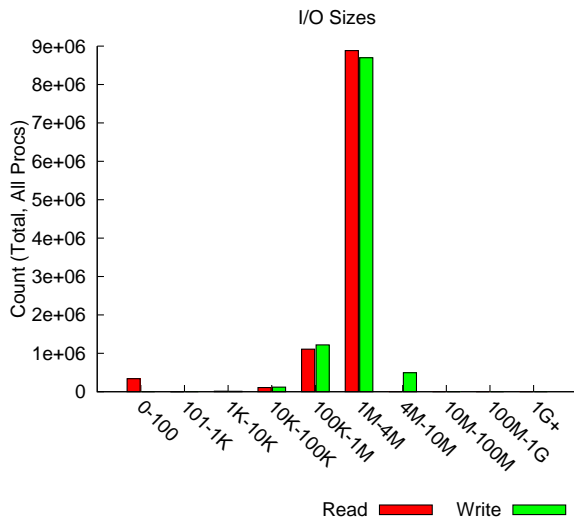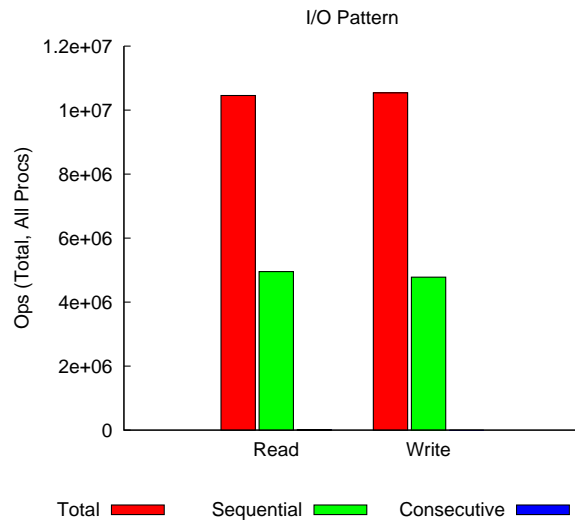

| access size | count  |
|-------------|--------|
| 4194304     | 555264 |
| 4           | 223104 |
| 3           | 111360 |
| 81964       | 1344   |

| type             | number of files | avg. size | max size |
|------------------|-----------------|-----------|----------|
| total opened     | 770             | 879M      | 1.2G     |
| read-only files  | 578             | 1.2G      | 1.2G     |
| write-only files | 0               | 0         | 0        |
| read/write files | 192             | 47M       | 47M      |
| created files    | 192             | 47M       | 47M      |

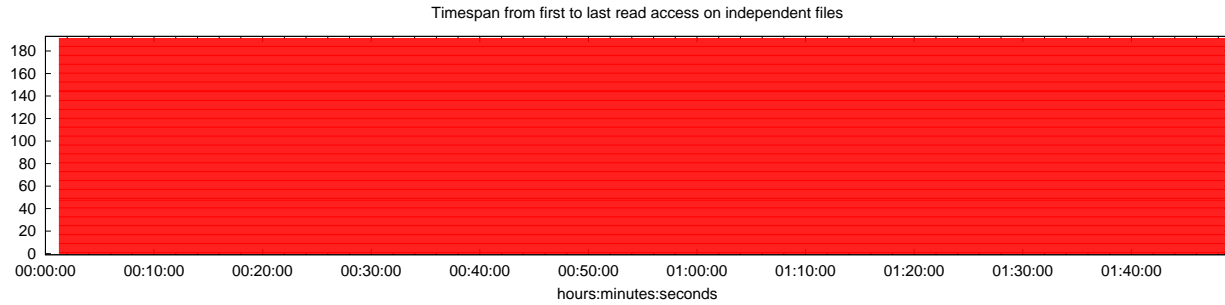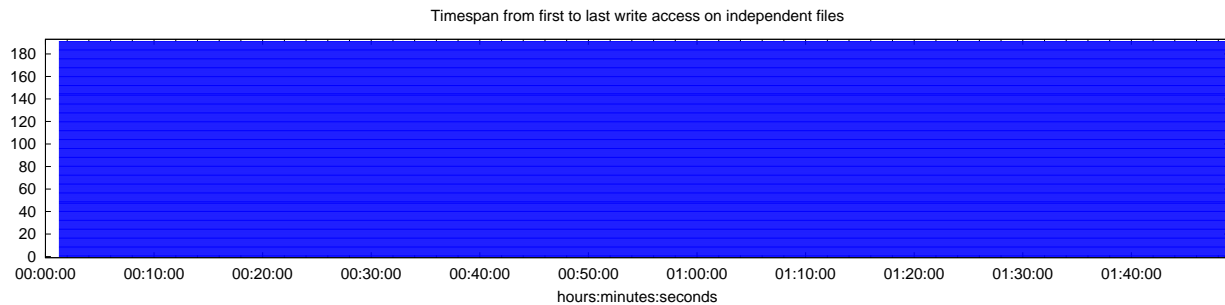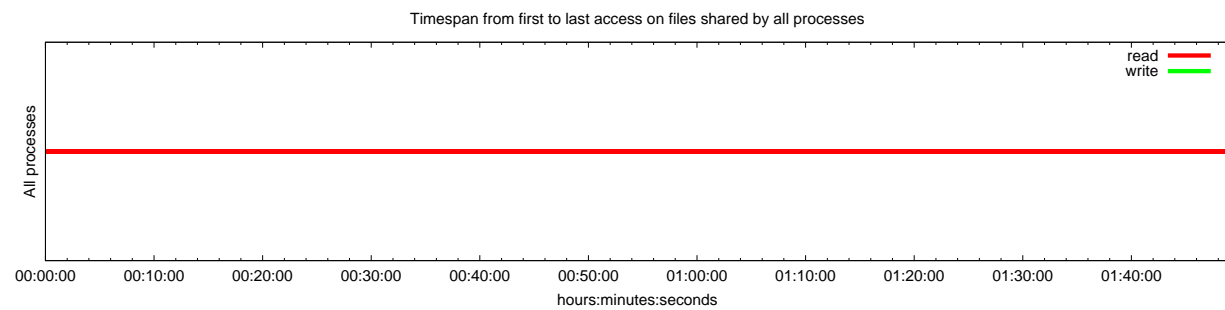

Average I/O per process

|                      | Cumulative time spent in I/O functions (seconds) | Amount of I/O (MB) |
|----------------------|--------------------------------------------------|--------------------|
| Independent reads    | 54.937552                                        | 148300.697231      |
| Independent writes   | 309.531370                                       | 168808.633598      |
| Independent metadata | 0.244743                                         | N/A                |
| Shared reads         | 44.410771                                        | 11577.651382       |
| Shared writes        | 0.000000                                         | 0.000000           |
| Shared metadata      | 32.748305                                        | N/A                |

Data Transfer Per Filesystem

| File System | Write          |         | Read           |         |
|-------------|----------------|---------|----------------|---------|
|             | MiB            | Ratio   | MiB            | Ratio   |
| /           | 0.00000        | 0.00000 | 265.83215      | 0.00001 |
| /mnt/c      | 32411257.65088 | 0.00000 | 30696377.10168 | 0.99999 |



## Variance in Shared Files

| File<br>Suffix     | Processes | Fastest |          |       | Slowest |          |       | $\sigma$ |          |
|--------------------|-----------|---------|----------|-------|---------|----------|-------|----------|----------|
|                    |           | Rank    | Time     | Bytes | Rank    | Time     | Bytes | Time     | Bytes    |
| ...RAJ/rem.crd.114 | 192       | 33      | 0.124623 | 8.1M  | 113     | 3.785623 | 2.3G  | 0.52     | 1.75e+08 |
| ...RAJ/rem.crd.055 | 192       | 71      | 0.101840 | 8.1M  | 54      | 3.653352 | 2.3G  | 0.523    | 1.75e+08 |
| ...RAJ/rem.crd.035 | 192       | 176     | 0.168210 | 8.1M  | 34      | 3.306591 | 2.3G  | 0.276    | 1.75e+08 |
| ...RAJ/rem.crd.016 | 192       | 172     | 0.099367 | 8.1M  | 15      | 3.057339 | 2.3G  | 0.262    | 1.75e+08 |
| ...RAJ/rem.crd.136 | 192       | 128     | 0.083264 | 8.1M  | 135     | 2.988848 | 2.3G  | 0.23     | 1.75e+08 |
| ...RAJ/rem.crd.044 | 192       | 109     | 0.169516 | 8.1M  | 43      | 2.986023 | 2.3G  | 0.206    | 1.75e+08 |
| ...RAJ/rem.crd.129 | 192       | 49      | 0.386875 | 8.1M  | 128     | 2.980287 | 2.3G  | 0.187    | 1.75e+08 |
| ...RAJ/rem.crd.105 | 192       | 64      | 0.079357 | 8.1M  | 104     | 2.948687 | 2.3G  | 0.22     | 1.75e+08 |
| ...RAJ/rem.crd.129 | 192       | 118     | 0.091200 | 8.1M  | 128     | 2.940905 | 2.3G  | 0.209    | 1.75e+08 |
| ...RAJ/rem.crd.005 | 192       | 144     | 0.126275 | 8.1M  | 4       | 2.922351 | 2.3G  | 0.192    | 1.75e+08 |
| ...RAJ/rem.crd.069 | 192       | 76      | 0.080420 | 8.1M  | 68      | 2.910364 | 2.3G  | 0.203    | 1.75e+08 |
| ...RAJ/rem.crd.134 | 192       | 160     | 0.099607 | 8.1M  | 133     | 2.905410 | 2.3G  | 0.201    | 1.75e+08 |
| ...RAJ/rem.crd.001 | 192       | 25      | 0.201269 | 13M   | 0       | 2.892505 | 2.3G  | 0.189    | 1.75e+08 |
| ...RAJ/rem.crd.129 | 192       | 169     | 0.094766 | 8.1M  | 128     | 2.886342 | 2.3G  | 0.228    | 1.75e+08 |
| ...RAJ/rem.crd.087 | 192       | 94      | 0.076258 | 8.1M  | 86      | 2.880964 | 2.3G  | 0.204    | 1.75e+08 |
| ...RAJ/rem.crd.017 | 192       | 176     | 0.174198 | 8.1M  | 16      | 2.868618 | 2.3G  | 0.192    | 1.75e+08 |
| ...RAJ/rem.crd.001 | 192       | 118     | 0.224117 | 13M   | 0       | 2.868463 | 2.3G  | 0.188    | 1.75e+08 |
| ...RAJ/rem.crd.016 | 192       | 165     | 0.077711 | 8.1M  | 15      | 2.863224 | 2.3G  | 0.2      | 1.75e+08 |
| ...RAJ/rem.crd.001 | 192       | 165     | 0.220775 | 13M   | 0       | 2.861363 | 2.3G  | 0.185    | 1.75e+08 |
| ...RAJ/rem.crd.188 | 192       | 144     | 0.075851 | 8.1M  | 187     | 2.860075 | 2.3G  | 0.21     | 1.75e+08 |

## 4 processes per replica

|                |            |             |                     |
|----------------|------------|-------------|---------------------|
| jobid: 3637697 | uid: 30029 | nprocs: 768 | runtime: 75 seconds |
|----------------|------------|-------------|---------------------|

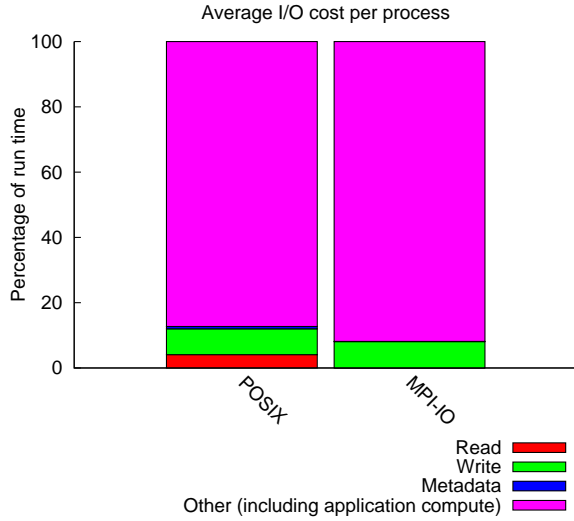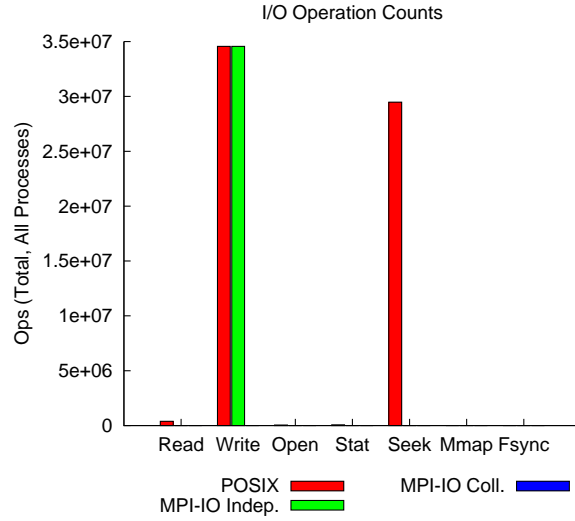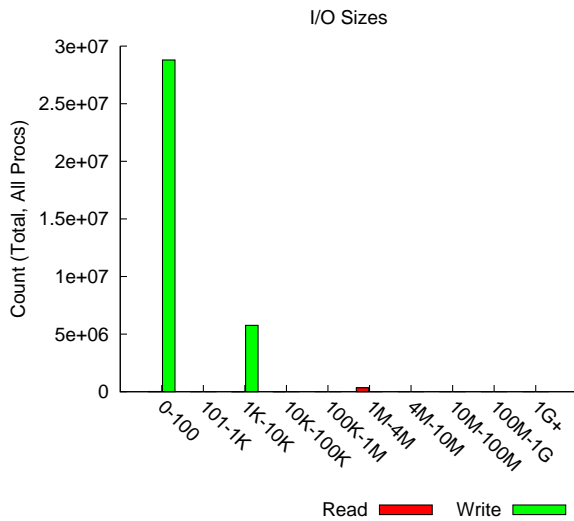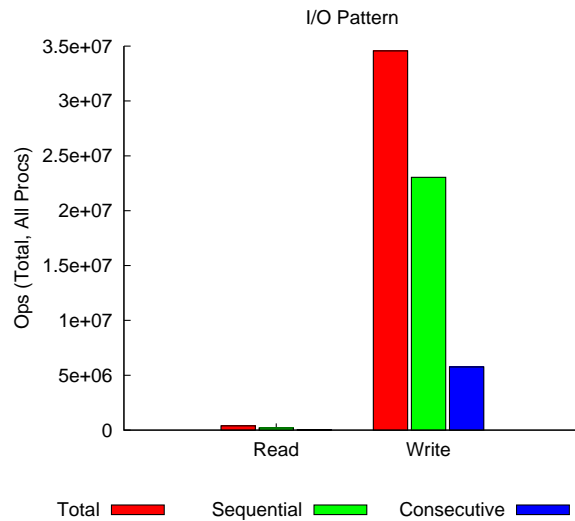

**Most Common Access Sizes**

| access size | count    |
|-------------|----------|
| 8           | 11520192 |
| 24          | 11520000 |
| 4           | 5769024  |
| 1572        | 5760576  |

**File Count Summary**  
(estimated by I/O access offsets)

| type             | number of files | avg. size | max size |
|------------------|-----------------|-----------|----------|
| total opened     | 770             | 879M      | 1.2G     |
| read-only files  | 578             | 1.2G      | 1.2G     |
| write-only files | 0               | 0         | 0        |
| read/write files | 192             | 47M       | 47M      |
| created files    | 192             | 47M       | 47M      |

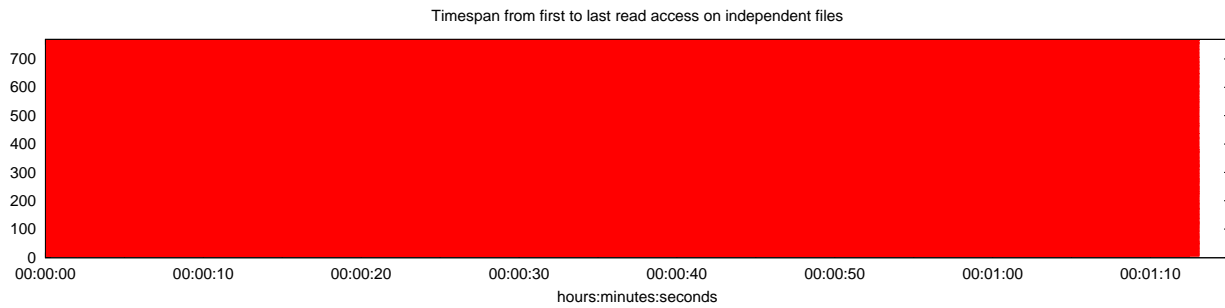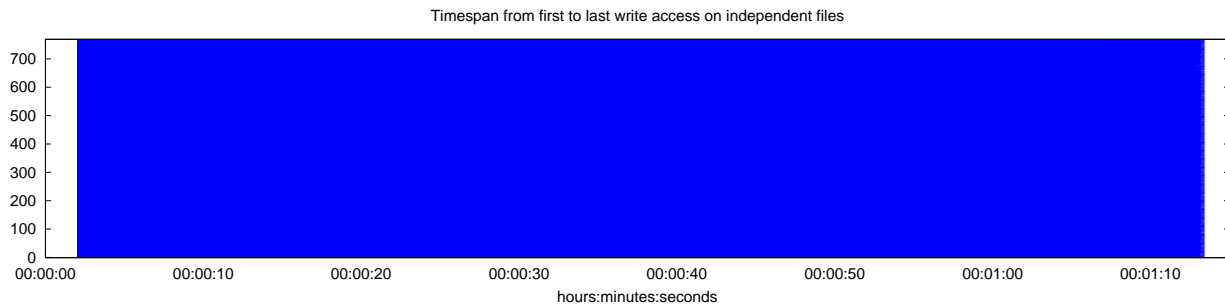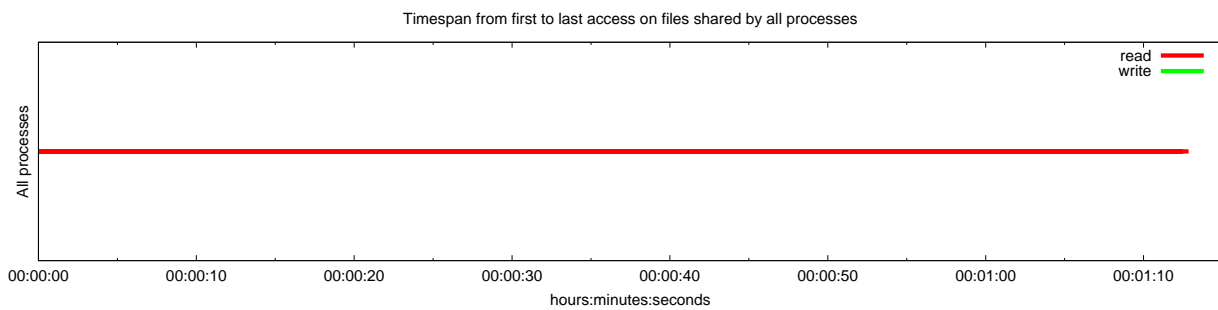

| Average I/O per process |                                                  |                    |
|-------------------------|--------------------------------------------------|--------------------|
|                         | Cumulative time spent in I/O functions (seconds) | Amount of I/O (MB) |
| Independent reads       | 2.481183                                         | 1759.851776        |
| Independent writes      | 5.944697                                         | 11.730681          |
| Independent metadata    | 0.256926                                         | N/A                |
| Shared reads            | 0.575267                                         | 22.598728          |
| Shared writes           | 0.000000                                         | 0.000000           |
| Shared metadata         | 0.272822                                         | N/A                |

| Data Transfer Per Filesystem |            |         |               |         |
|------------------------------|------------|---------|---------------|---------|
| File System                  | Write      |         | Read          |         |
|                              | MiB        | Ratio   | MiB           | Ratio   |
| /                            | 0.00000    | 0.00000 | 1063.32861    | 0.00078 |
| /mnt/c                       | 9009.16333 | 0.00000 | 1367858.65796 | 0.99922 |

## Variance in Shared Files

| File Suffix        | Processes | Fastest |          |       | Slowest |          |       | $\sigma$ |          |
|--------------------|-----------|---------|----------|-------|---------|----------|-------|----------|----------|
|                    |           | Rank    | Time     | Bytes | Rank    | Time     | Bytes | Time     | Bytes    |
| ...0-2.nowat.nc.17 | 4         | 71      | 7.222066 | 12M   | 68      | 9.84986  | 12M   | 1.11     | 1.78e+03 |
| ...n0-2.nowat.nc.6 | 4         | 27      | 6.498477 | 12M   | 24      | 8.658202 | 12M   | 0.851    | 1.78e+03 |
| ...0-2.nowat.nc.95 | 4         | 383     | 5.897218 | 12M   | 381     | 8.599763 | 12M   | 1.09     | 1.78e+03 |
| ...-2.nowat.nc.113 | 4         | 455     | 5.611698 | 12M   | 452     | 8.226118 | 12M   | 0.953    | 1.78e+03 |
| ...-2.nowat.nc.171 | 4         | 687     | 5.210494 | 12M   | 684     | 8.031502 | 12M   | 1.07     | 1.78e+03 |
| ...-2.nowat.nc.103 | 4         | 415     | 5.389028 | 12M   | 412     | 7.757018 | 12M   | 0.852    | 1.78e+03 |
| ...-2.nowat.nc.114 | 4         | 459     | 5.631735 | 12M   | 456     | 7.745795 | 12M   | 0.794    | 1.78e+03 |
| ...-2.nowat.nc.179 | 4         | 719     | 5.570011 | 12M   | 716     | 7.712014 | 12M   | 0.813    | 1.78e+03 |
| ...-2.nowat.nc.175 | 4         | 703     | 5.212742 | 12M   | 700     | 7.64251  | 12M   | 0.863    | 1.78e+03 |
| ...-2.nowat.nc.129 | 4         | 519     | 5.170251 | 12M   | 516     | 7.63082  | 12M   | 0.963    | 1.78e+03 |
| ...-2.nowat.nc.131 | 4         | 527     | 5.294287 | 12M   | 524     | 7.620544 | 12M   | 0.874    | 1.78e+03 |
| ...-2.nowat.nc.106 | 4         | 427     | 4.999499 | 12M   | 424     | 7.590011 | 12M   | 0.968    | 1.78e+03 |
| ...0-2.nowat.nc.27 | 4         | 111     | 6.020544 | 12M   | 108     | 7.583287 | 12M   | 0.612    | 1.78e+03 |
| ...0-2.nowat.nc.16 | 4         | 67      | 5.167673 | 12M   | 64      | 7.474077 | 12M   | 0.966    | 1.78e+03 |
| ...-2.nowat.nc.139 | 4         | 559     | 4.519389 | 12M   | 556     | 7.448442 | 12M   | 1.09     | 1.78e+03 |
| ...-2.nowat.nc.173 | 4         | 695     | 4.886281 | 12M   | 692     | 7.445973 | 12M   | 0.967    | 1.78e+03 |
| ...-2.nowat.nc.121 | 4         | 487     | 4.939084 | 12M   | 484     | 7.443133 | 12M   | 0.978    | 1.78e+03 |
| ...0-2.nowat.nc.24 | 4         | 99      | 4.958237 | 12M   | 96      | 7.424861 | 12M   | 0.903    | 1.78e+03 |
| ...-2.nowat.nc.135 | 4         | 543     | 5.013659 | 12M   | 540     | 7.423809 | 12M   | 0.928    | 1.78e+03 |
| ...-2.nowat.nc.160 | 4         | 643     | 4.57623  | 12M   | 640     | 7.413212 | 12M   | 1.07     | 1.78e+03 |
